# Supplementary material for: Is heat pain detection threshold associated with the area of secondary hyperalgesia following brief thermal sensitization? A study of healthy volunteers - design and detailed plan of analysis
Source: PubMed Central journal article supplement (PMC4888470; doi:10.1186/s12871-016-0193-2), 2016-05-31
Supplement: 12871_2016_193_MOESM1_ESM.pdf [file 12871_2016_193_MOESM1_ESM.pdf]

Department of Biostatistics,  
University of Copenhagen

February 16, 2015  
2015  
CP

## Internal report 3 version 2

# A simulation study on the power to detect an effect of HPDT and VAS on BTS

Morten Sejer Hansen (RH)

## Contents

|          |                                                       |          |
|----------|-------------------------------------------------------|----------|
| <b>1</b> | <b>Simulation design</b>                              | <b>1</b> |
| <b>2</b> | <b>Estimation and inference</b>                       | <b>1</b> |
| <b>3</b> | <b>Obtaining parameter values for the simulations</b> | <b>2</b> |
| <b>4</b> | <b>Results</b>                                        | <b>3</b> |
| <b>5</b> | <b>Appendix: R code</b>                               | <b>4</b> |

Christian Phipper

*Internal reports are preliminary working papers which are confidential unless an explicit agreement to the contrary has been reached between the clients and the author of the report.*

# 1 Simulation design

We consider  $n$  persons. For the  $i$ th person on the we simulate individual BTS levels according to the model

$$BTS_i = \mu + \beta_1 \cdot HPDT_i + \beta_2 \cdot AVAS_i + \beta_3 \cdot MVAS_i + \varepsilon_i, \quad (1)$$

where  $\mu$  is the overall level of the response,  $HPDT_i, MVAS_i, AVAS_i$  correspond to the eblups (individual summaries of HPDT, MVAS, AVAS) extracted as described in internal report 2 version 1,  $\beta_1, \beta_2, \beta_3$  are effects of predictors, and  $\varepsilon_i$  are measurement errors distributed according to  $N(0, \sigma^2)$ .

Values of HPDT, MVAS and AVAS are sampled with replacement from the simultaneous empirical distribution obtained from the hyperalgesia 1 study.

We also consider the alternative model

$$BTS_i = \nu + \beta \cdot HPDT_i + \eta_i, \quad (2)$$

where  $\eta_i$  are measurement errors distributed according to  $N(0, \sigma_1^2)$ .

All simulations are conducted in R version 3.0.2 ([www.r-project.org](http://www.r-project.org))

## 2 Estimation and inference

For a given simulated data set according to (1) inference is based on multiple linear regression The effect of HPDT and the simultaneous effect of MVAS and AVAS is assessed by F-tests.

For a given simulated data set according to (2) inference is based on simple linear regression The effect of HPDT by a t-test.

All analyses are conducted with the R-functions `lm()` and `lmer()` available from the `lme4` add-on R package.

### 3 Obtaining parameter values for the simulations

We analysed measurements from the first two days of the hyperalgesia 1 data according to (1) and obtained the following parameter model output

```
Call:
lm(formula = eblups2 ~ hpdt2 + avas2 + mvas2, data = datatilsim)
```

```
Residuals:
    Min       1Q   Median       3Q      Max
-236.104  -69.970   -6.324   79.505  308.781
```

```
Coefficients:
              Estimate Std. Error t value Pr(>|t|)
(Intercept)  4.392e-12  1.671e+01   0.000  1.00000
hpdt2       -2.424e+01  8.423e+00  -2.878  0.00605 **
avas2        6.210e-02  5.260e-02   1.180  0.24388
mvas2       -8.432e-01  2.495e+00  -0.338  0.73693
---
Signif. codes:  0 '***' 0.001 '**' 0.01 '*' 0.05 '.' 0.1 ' ' 1
```

```
Residual standard error: 118.2 on 46 degrees of freedom
Multiple R-squared:  0.2536, Adjusted R-squared:  0.2049
F-statistic: 5.209 on 3 and 46 DF,  p-value: 0.003511
```

```
Call:
lm(formula = eblups2 ~ hpdt2, data = datatilsim)
```

```
Residuals:
    Min       1Q   Median       3Q      Max
-249.637  -73.450   5.549   73.032  285.217
```

```
Coefficients:
              Estimate Std. Error t value Pr(>|t|)
(Intercept)  3.949e-12  1.688e+01   0.000  1.00000
hpdt2       -2.837e+01  8.062e+00  -3.519  0.00096 ***
---
Signif. codes:  0 '***' 0.001 '**' 0.01 '*' 0.05 '.' 0.1 ' ' 1
```

```
Residual standard error: 119.4 on 48 degrees of freedom
Multiple R-squared:  0.2051, Adjusted R-squared:  0.1885
F-statistic: 12.38 on 1 and 48 DF,  p-value: 0.0009596
```

From this output we extract the following parameter values used for subsequent simulation

$$\begin{aligned}
\mu &= 4.392 \cdot 10^{-12}, \\
\beta_1 &= -2.424 \cdot 10^1, \\
\beta_2 &= 6.210 \cdot 10^{-2}, \\
\beta_3 &= -8.432 \cdot 10^{-1}, \\
\sigma &= 118.2, \\
\nu &= 3.949e \cdot 10^{-12}, \\
\beta &= -2.837 \cdot 10^1, \\
\sigma_1 &= 119.4
\end{aligned}$$

## 4 Results

We considered the n ranging from 50 to 250 and calculated power according to the following criteria

- Significant effects of both HPDT and VAS in simulation design (1)
- Significant effect of one or both of HPDT or VAS in simulation design (1)
- Significant effect of HPDT in simulation design (2)

For each n and each criterium we generated 1000 simulated data sets. For criterium 1 and each data set we calculated the p-value as the maximum of two p-values corresponding to adjusted effects of HPDT and VAS, respectively. For criterium 2 the calculated p-value corresponds to an F test for any effect of either HPDT or VAS. For criterium 3 the calculated p-value corresponds to a t-test for effect of HPDT. For each of the criteria the power was calculated as the fraction of times the calculated p-value was below 5%.

From figure 1 and table 1 we see that approximately 170 persons are needed to obtain a power of 80% with criterium 1. For the two other criteria powers are well above 80% already with 50 persons.

| Number of persons | power (criterium 1) | power (criterium 2) | power (criterium 3) |
|-------------------|---------------------|---------------------|---------------------|
| 50                | 0.195               | 0.864               | 0.911               |
| 160               | 0.773               | 1.000               | 1.000               |
| 170               | 0.807               | 1.000               | 1.000               |
| 180               | 0.851               | 1.000               | 1.000               |

Table 1: Simulated powers to detect an effect of HPDT and VAS for varying number of persons

## 5 Appendix: R code

```
#power study hyperalgesia 2

#Extracting information from hyperalgesia 1
#For simulation of power in hyperalgesia 2

library(gdata)
hyperdata<-read.xls(file.choose(),sheet=10)
head(hyperdata)
names(hyperdata)
with(hyperdata,length(levels(factor(Forsøgsnummer))))
with(hyperdata,table(X3.Obs..1.A..2.B.))
Day<-rep(1:4,rep(50,4))
personid<-with(hyperdata,rep(Forsøgsnummer,4))
observer<-with(hyperdata,c(X1.Obs..1.A..2.B.,X2.Obs..1.A..2.B.,X3.Obs..1.A..2.B.,X4.Obs..1.A..2.B.))
observer
BTS<-with(hyperdata,c(X1.BTS.Areal..cm2.,X2.BTS.Areal..cm2.,X3.BTS.Areal..cm2.,X4.BTS.Areal..cm2.))
length(BTS)
HPDT<-with(hyperdata,c(X1.HPDT...C.,X2.HPDT...C.,X3.HPDT...C.,X4.HPDT...C.))
MVAS<-with(hyperdata,c(X1.LTS.MAX..mm.,X2.LTS.max..mm.,X3.LTS.max..mm.,X4.LTS.max..mm.))
AVAS<-with(hyperdata,c(X1.LTS.AUC,X2.LTS.AUC,X3.LTS.AUC,X4.LTS.AUC))

datatilsim<-data.frame(personid,Day,observer,BTS,HPDT,MVAS,AVAS)

#####
#extracting parameters#####
#####

modelsim4<-lmer(BTS~1+(1|observer)+(1|personid),data=subset(datatilsim,Day<5))
modelsim3<-lmer(BTS~1+(1|observer)+(1|personid),data=subset(datatilsim,Day<4))
modelsim2<-lmer(BTS~1+(1|observer)+(1|personid),data=subset(datatilsim,Day<3))
summary(modelsim4)
summary(modelsim3)
summary(modelsim2)
```

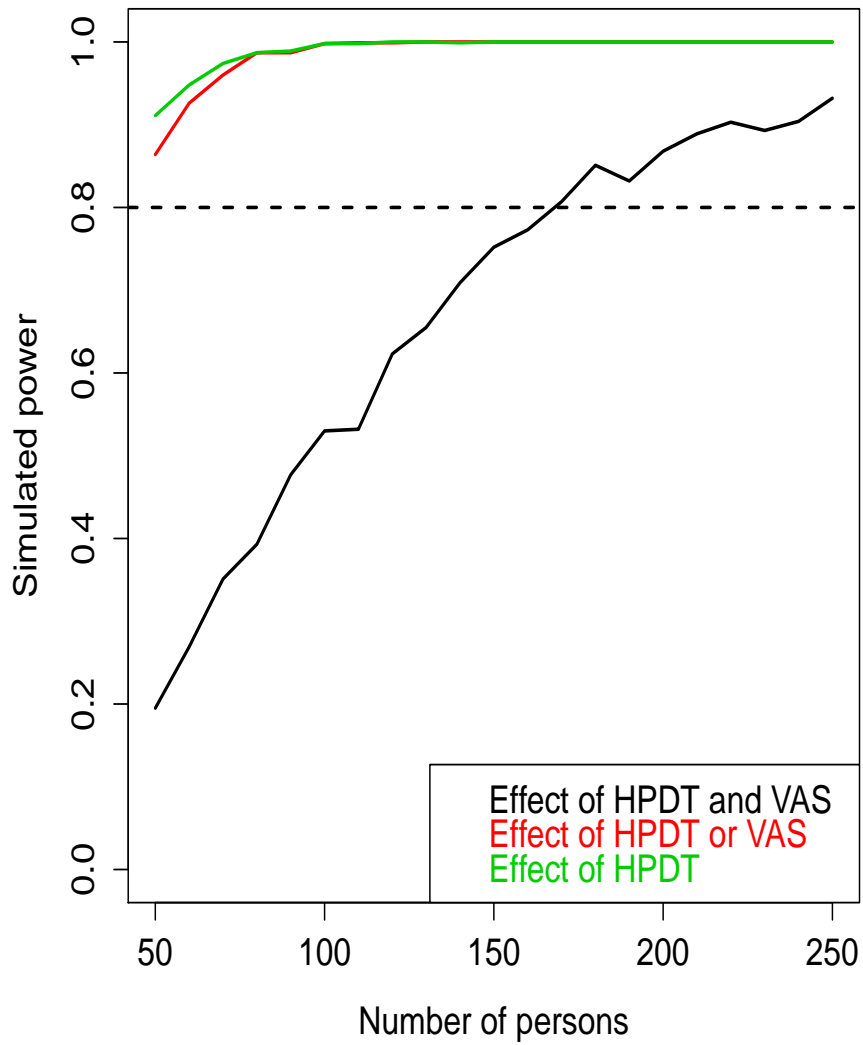

Figure 1: Simulated powers to detect effects of HPDT and VAS for varying number of persons

```

eblups4<-as.vector(unlist(ranef(modelsim4)[[1]]))
eblups3<-as.vector(unlist(ranef(modelsim3)[[1]]))
eblups2<-as.vector(unlist(ranef(modelsim2)[[1]]))

hpdt4<-as.vector(unlist(ranef(lmer(HPDT~1+(1|observer)+(1|personid),data=subset(datatilsim,Day<5)))[[1]]))
hpdt3<-as.vector(unlist(ranef(lmer(HPDT~1+(1|observer)+(1|personid),data=subset(datatilsim,Day<4)))[[1]]))
hpdt2<-as.vector(unlist(ranef(lmer(HPDT~1+(1|observer)+(1|personid),data=subset(datatilsim,Day<3)))[[1]]))

avas4<-as.vector(unlist(ranef(lmer(AVAS~1+(1|observer)+(1|personid),data=subset(datatilsim,Day<5)))[[1]]))
avas3<-as.vector(unlist(ranef(lmer(AVAS~1+(1|observer)+(1|personid),data=subset(datatilsim,Day<4)))[[1]]))
avas2<-as.vector(unlist(ranef(lmer(AVAS~1+(1|observer)+(1|personid),data=subset(datatilsim,Day<3)))[[1]]))

mvas4<-as.vector(unlist(ranef(lmer(MVAS~1+(1|observer)+(1|personid),data=subset(datatilsim,Day<5)))[[1]]))
mvas3<-as.vector(unlist(ranef(lmer(MVAS~1+(1|observer)+(1|personid),data=subset(datatilsim,Day<4)))[[1]]))
mvas2<-as.vector(unlist(ranef(lmer(MVAS~1+(1|observer)+(1|personid),data=subset(datatilsim,Day<3)))[[1]]))

datatilsim<-data.frame(eblups4,eblups3,eblups2,hpdt4,hpdt3,hpdt2,avas4,avas3,avas2,mvas4,mvas3,mvas2)

fit4<-lm(eblups4~hpdt4+avas4+mvas4,data=datatilsim)
fit3<-lm(eblups3~hpdt3+avas3+mvas3,data=datatilsim)
fit2<-lm(eblups2~hpdt2+avas2+mvas2,data=datatilsim)
summary(fit2)

#####

Call:
lm(formula = eblups2 ~ hpdt2 + avas2 + mvas2, data = datatilsim)

Residuals:
    Min       1Q   Median       3Q      Max
-236.104  -69.970   -6.324   79.505  308.781

Coefficients:
(Intercept)  4.392e-12  1.671e+01  0.000  1.00000
hpdt2        -2.424e+01  8.423e+00  -2.878  0.00605 **
avas2         6.210e-02  5.260e-02  1.180  0.24388
mvas2        -8.432e-01  2.495e+00  -0.338  0.73693
---
Signif. codes:  0 '***' 0.001 '**' 0.01 '*' 0.05 '.' 0.1 ' ' 1

Residual standard error: 118.2 on 46 degrees of freedom
Multiple R-squared:  0.2536, Adjusted R-squared:  0.2049
F-statistic: 5.209 on 3 and 46 DF, p-value: 0.003511
#####

baseline.mean<-c(coef(fit2)[1],coef(fit3)[1],coef(fit4)[1])
beta.hpdt<-c(coef(fit2)[2],coef(fit3)[2],coef(fit4)[2])
beta.avas<-c(coef(fit2)[3],coef(fit3)[3],coef(fit4)[3])
beta.mvas<-c(coef(fit2)[4],coef(fit3)[4],coef(fit4)[4])
sd.res<-c(summary(fit2)$sigma,summary(fit3)$sigma,summary(fit4)$sigma)

baseline.mean
beta.hpdt
beta.avas

```

```

beta.mvas
sd.res

#####
> baseline.mean
(Intercept) (Intercept) (Intercept)
4.392127e-12 4.957095e-12 -5.164214e-13
> beta.hpdt
hpdt2 hpdt3 hpdt4
-24.24115 -24.53525 -23.40930
> beta.avas
avas2 avas3 avas4
0.06209574 0.03872417 0.03642940
> beta.mvas
mvas2 mvas3 mvas4
-0.84316781 0.06123866 -0.23581709
> sd.res
[1] 118.1687 111.9656 113.7461
>

#####

fit4.a<-lm(eblups4~hpdt4,data=datatilsim)
fit3.a<-lm(eblups3~hpdt3,data=datatilsim)
fit2.a<-lm(eblups2~hpdt2,data=datatilsim)
summary(fit2.a)

#####

Call:
lm(formula = eblups2 ~ hpdt2, data = datatilsim)

Residuals:
    Min       1Q   Median       3Q      Max
-249.637  -73.450   5.549   73.032  285.217

Coefficients:
    Estimate Std. Error t value Pr(>|t|)
(Intercept)  3.949e-12  1.688e+01  0.000  1.00000
hpdt2       -2.837e+01  8.062e+00  -3.519  0.00096 ***
---
Signif. codes:  0 '***' 0.001 '**' 0.01 '*' 0.05 '.' 0.1 ' ' 1

Residual standard error: 119.4 on 48 degrees of freedom
Multiple R-squared:  0.2051, Adjusted R-squared:  0.1885
F-statistic: 12.38 on 1 and 48 DF, p-value: 0.0009596

#####

baseline.mean.a<-c(coef(fit2.a)[1],coef(fit3.a)[1],coef(fit4.a)[1])
beta.hpdt.a<-c(coef(fit2.a)[2],coef(fit3.a)[2],coef(fit4.a)[2])
sd.res.a<-c(summary(fit2.a)$sigma,summary(fit3.a)$sigma,summary(fit4.a)$sigma)

baseline.mean.a
beta.hpdt.a
sd.res.a

#####
> baseline.mean.a

```



```

(Intercept) (Intercept) (Intercept)
3.948797e-12 5.996380e-12 6.212621e-13
> beta.hpdt.a
hpdt2 hpdt3 hpdt4
-28.37033 -28.22663 -26.34637
> sd.res.a
[1] 119.3813 112.2607 113.1335
>

```

```

#####
#####
#Simulation functions#####
#####
#####

```

```

#####
#Helping function for sampling from#
#the simultaneous empirical dist of#
#eblups of HPDT,MVAS,AVAS #####
#####
empdistmeas<-function(Npers,datatilsim,Ndays){
  n<-dim(datatilsim)[1]
  samples<-sample(1:n,Npers,replace=T)
  personid<-1:Npers
  if(Ndays==2){
    hpdt<-datatilsim$hpdt2
    avas<-datatilsim$avas2
    mvas<-datatilsim$mvas2
  }
  if(Ndays==3){
    hpdt<-datatilsim$hpdt3
    avas<-datatilsim$avas3
    mvas<-datatilsim$mvas3
  }
  if(Ndays==4){
    hpdt<-datatilsim$hpdt4
    avas<-datatilsim$avas4
    mvas<-datatilsim$mvas4
  }
  data.frame(personid,hpdt=hpdt[samples],avas=avas[samples],mvas=mvas[samples])
}

```

```

#####
#Function for simulating datasets####
#NB: only one observer here #
#NBB: number of persons and number of#
#days may be varied#####
#####

```

```

simulationdata<-function(Ndays,Npers,sd.res,baseline.mean,beta.hpdt,beta.mvas,beta.avas,datatilsim)
{
  sim.emp.data<-empdistmeas(Npers,datatilsim,Ndays)
  hpdt<-sim.emp.data$hpdt
  avas<-sim.emp.data$avas
  mvas<-sim.emp.data$mvas
  if(Ndays==2){
    bts<-baseline.mean[1]+beta.hpdt[1]*hpdt+beta.avas[1]*avas+beta.mvas[1]*mvas+sd.res[1]*rnorm(Npers)

```

```

}
if(Ndays==3){
  bts<-baseline.mean[2]+beta.hpdt[2]*hpdt+beta.avas[2]*avas+beta.mvas[2]*mvas+sd.res[2]*rnorm(Npers)
}
if(Ndays==4){
  bts<-baseline.mean[3]+beta.hpdt[3]*hpdt+beta.avas[3]*avas+beta.mvas[3]*mvas+sd.res[3]*rnorm(Npers)
}
}
data.frame(bts, hpdt, avas, mvas)
}

simulationdata1<-function(Ndays,Npers,sd.res.a,baseline.mean.a,beta.hpdt.a,datatilsim)
{
  sim.emp.data<-empdistmeas(Npers,datatilsim,Ndays)
  hpdt<-sim.emp.data$hpdt
  if(Ndays==2){
    bts<-baseline.mean.a[1]+beta.hpdt.a[1]*hpdt+sd.res.a[1]*rnorm(Npers)
  }

  if(Ndays==3){
    bts<-baseline.mean.a[2]+beta.hpdt.a[2]*hpdt+sd.res.a[2]*rnorm(Npers)
  }
  if(Ndays==4){
    bts<-baseline.mean.a[3]+beta.hpdt.a[3]*hpdt+sd.res.a[3]*rnorm(Npers)
  }
  data.frame(bts, hpdt)
}

#####
#Simulating power based on 1000 simulations #
#for each of a number of different scenarios #
#varying number of persons and number of days #
#with measurements #
#####

Nsim<-1000
Npers<-rep(seq(50,250,by=10),1)
Ndays<-rep(2,c(21))
power<-rep(0,length(Npers))
power1<-rep(0,length(Npers))
power2<-rep(0,length(Npers))

for (i in 1:length(Npers)){
  count<-0
  count1<-0
  count2<-0
  for (j in 1:Nsim){
    simdat<-simulationdata(Ndays[i],Npers[i],sd.res,baseline.mean.a,beta.hpdt,beta.mvas,beta.avas,datatilsim)
    simdat.a<-simulationdata1(Ndays[i],Npers[i],sd.res.a,baseline.mean.a,beta.hpdt.a,datatilsim)
    fit1<-lm(bts~hpdt+avas+mvas,data=simdat)
    fit21<-lm(bts~hpdt,data=simdat)
    fit22<-lm(bts~avas+mvas,data=simdat)
    fit3<-lm(bts~1,data=simdat)
    fit1.a<-lm(bts~hpdt,data=simdat.a)
    fit2.a<-lm(bts~1,data=simdat.a)
    pval1<-anova(fit1,fit21,test="F")[["Pr(>F)"]][2]

```

```

pval2<-anova(fit1,fit2,test="F")["Pr(>F)"] [2]
pval3<-anova(fit1,fit3,test="F")["Pr(>F)"] [2]
pval.a<-anova(fit1.a,fit2.a,test="F")["Pr(>F)"] [2]
count<-count+ifelse(pval1<0.05 & pval2<0.05,1,0)
count1<-count1+ifelse(pval3<0.05,1,0)
count2<-count2+ifelse(pval.a<0.05,1,0)
}
power[i]<-count/Nsim
power1[i]<-count1/Nsim
power2[i]<-count2/Nsim
print(Npers[i])
print(Ndays[i])
print(power[i])
print(power1[i])
print(power2[i])
}

```

```

powerdata<-data.frame(Npers,Ndays,power,power1,power2)
powerdata
#####

```

| Npers | Ndays | power   | power1 | power2 |
|-------|-------|---------|--------|--------|
| 1     | 50    | 2 0.195 | 0.864  | 0.911  |
| 2     | 60    | 2 0.269 | 0.926  | 0.948  |
| 3     | 70    | 2 0.351 | 0.960  | 0.974  |
| 4     | 80    | 2 0.393 | 0.987  | 0.987  |
| 5     | 90    | 2 0.477 | 0.987  | 0.989  |
| 6     | 100   | 2 0.530 | 0.998  | 0.998  |
| 7     | 110   | 2 0.532 | 0.999  | 0.998  |
| 8     | 120   | 2 0.623 | 0.999  | 1.000  |
| 9     | 130   | 2 0.655 | 1.000  | 1.000  |
| 10    | 140   | 2 0.709 | 1.000  | 0.999  |
| 11    | 150   | 2 0.752 | 1.000  | 1.000  |
| 12    | 160   | 2 0.773 | 1.000  | 1.000  |
| 13    | 170   | 2 0.807 | 1.000  | 1.000  |
| 14    | 180   | 2 0.851 | 1.000  | 1.000  |
| 15    | 190   | 2 0.832 | 1.000  | 1.000  |
| 16    | 200   | 2 0.868 | 1.000  | 1.000  |
| 17    | 210   | 2 0.889 | 1.000  | 1.000  |
| 18    | 220   | 2 0.903 | 1.000  | 1.000  |
| 19    | 230   | 2 0.893 | 1.000  | 1.000  |
| 20    | 240   | 2 0.904 | 1.000  | 1.000  |
| 21    | 250   | 2 0.932 | 1.000  | 1.000  |

```

plot(power~Npers,type="l",col=1,lwd=2,data=subset(powerdata,Ndays==2),xlab="Number of persons",ylab="Simulated power",ylim=c(0,1))
with(powerdata,points(y=power1,x=Npers,type="l",col=2,lwd=2))
with(powerdata,points(y=power2,x=Npers,type="l",col=3,lwd=2))
abline(0.8,0,lty=2,lwd=2)
legend("bottomright",
      legend=c("Effect of HPDT and VAS", "Effect of HPDT or VAS", "Effect of HPDT"),
      text.col=1:3)

```
